# Supplementary material for: Distinct Tumor Microenvironments Are a Defining Feature of Strain-Specific CRISPR/Cas9-Induced MPNSTs
Source: PubMed Central journal article supplement (PMC7288323; doi:10.3390/genes11050583), 2020-05-23
Supplement: genes-11-00583-s001.pdf [file genes-11-00583-s001.pdf]

Table S1: Primer and guide RNA sequences

| <b>Primer/gRNA Name</b> | <b>Sequence (5' to 3')</b>   | <b>Use</b>             |
|-------------------------|------------------------------|------------------------|
| gNf1                    | GGACATCTCCAAGGATGTGGTGG      | gRNA targeting Nf1     |
| gTrp53                  | GATGGTAAGGATAGGTCCGCGG       | gRNA targeting Trp53   |
| Nf1 fw                  | TAGCAATTTTGGGGGAACGC         | PCR for Indel Analysis |
| Nf1 rv                  | GTCAGAGCCTTTCAGTCATG         |                        |
| Trp53 fw                | TGCCGAACAGGTGGAATATC         | PCR for Indel Analysis |
| Trp53 rv                | CATCCTGACTGTGTGTAAGCTAGGCCCC |                        |
| Arg1 fw                 | AGAGATTATCGGAGCGCCTT         | RT-qPCR                |
| Arg1 rv                 | TTTTTCCAGCAGACCAGCTT         |                        |
| Nos2 fw                 | CACTTGGATCAGGAACCTGAAGCCC    | RT-qPCR                |
| Nos2 rv                 | CTTTGTGCTGGGAGTCATGGAGCCG    |                        |
| Stat3 fw                | CAATACCATTGACCTGCCGAT        | RT-qPCR                |
| Stat3 rv                | GAGCGACTCAAACCTGCCCT         |                        |
| Cd80 fw                 | CTCTTTGTGCTGCTGATTCG         | RT-qPCR                |
| Cd80 rv                 | GGCAAGGCAGCAATACCTTA         |                        |
| Cd86 fw                 | CTTACGGAAGCACCCATGAT         | RT-qPCR                |
| Cd86 rv                 | TCTCCACGGAACAGCATCT          |                        |
| Cd83 fw                 | GCTCTCCTATGCAGTGCCTG         | RT-qPCR                |
| Cd83 rv                 | TCGAAGGAGCTGTTTTGCTT         |                        |
| OX40L (Tnfsf4) fw       | CTAAGGCTGGTGGTCTCTGG         | RT-qPCR                |
| OX40L (Tnfsf4) rv       | CTTTGGATTGGAGGGTCCTT         |                        |
| Foxp3 fw                | TGGCAGAGAGGTATTGAGGG         | RT-qPCR                |
| Foxp3 rv                | CTCGTCTGAAGGCAGAGTCA         |                        |
| PD-L1 (CD274) fw        | GCTCCAAAGGACTTGTACGTG        | RT-qPCR                |
| PD-L1 (CD274) rv        | TGATCTGAAGGGCAGCATTC         |                        |
| Ctla-4 fw               | GCCTTCTAGGACTTGGCCTT         | RT-qPCR                |
| Ctla-4 rv               | CACTGAAGGTTGGGTACCT          |                        |
| Vegfa fw                | GCTTCCTACAGCACAGCAGA         | RT-qPCR                |
| Vegfa rv                | AATGCTTTCTCCGCTCTGAA         |                        |

|                  |                          |         |
|------------------|--------------------------|---------|
| VEGFR1 (Flt1) fw | CTGCTCGGGTGTCTGCTT       | RT-qPCR |
| VEGFR1 (Flt1) rv | AAGAGAGTCTGGCCTGCTTG     |         |
| VEGFR2 (Kdr) fw  | AAACCTCCTGCAAGCAAATG     | RT-qPCR |
| VEGFR2 (Kdr) rv  | TCCAGAATCCTCTTCCATGC     |         |
| Ccl21 fw         | CCCTGCTTCAACCATTACATCTGC | RT-qPCR |
| Ccl21 rv         | CCTGCTGTCTCCTTCCTCATTCC  |         |
| Il10 fw          | ATCGATTCTCCCCTGTGAA      | RT-qPCR |
| Il10 rv          | TGTCAAATTCATTCATGGCCT    |         |
| Il1b fw          | GAAATGCCACCTTTTGACAGTG   | RT-qPCR |
| Il1b rv          | CTGGATGCTCTCATCAGGACA    |         |
| Il4 fw           | GGATGTGCCAAACGTCCTC      | RT-qPCR |
| Il4 rv           | GAGTTCTTCTTCAAGCATGGAG   |         |
| Ifng fw          | TCTGGAGGAACTGGCAAAG      | RT-qPCR |
| Ifng rv          | TTCAAGACTTCAAAGAGTCTGAGG |         |
| Tgfb1 fw         | GGAGAGCCCTGGATACCAAC     | RT-qPCR |
| Tgfb1 rv         | CAACCCAGGTCCTTCCTAAA     |         |
| Tnfa fw          | CTTCTGTCTACTGAACCTCGGG   | RT-qPCR |
| Tnfa rv          | CACTTGGTGGTTTGCTACGAC    |         |
| B2M fw           | GGTCTTTCTGGTGCTTGTCTC    | RT-qPCR |
| B2M rv           | G TTCAGTATGTTCGGCTTCCC   |         |

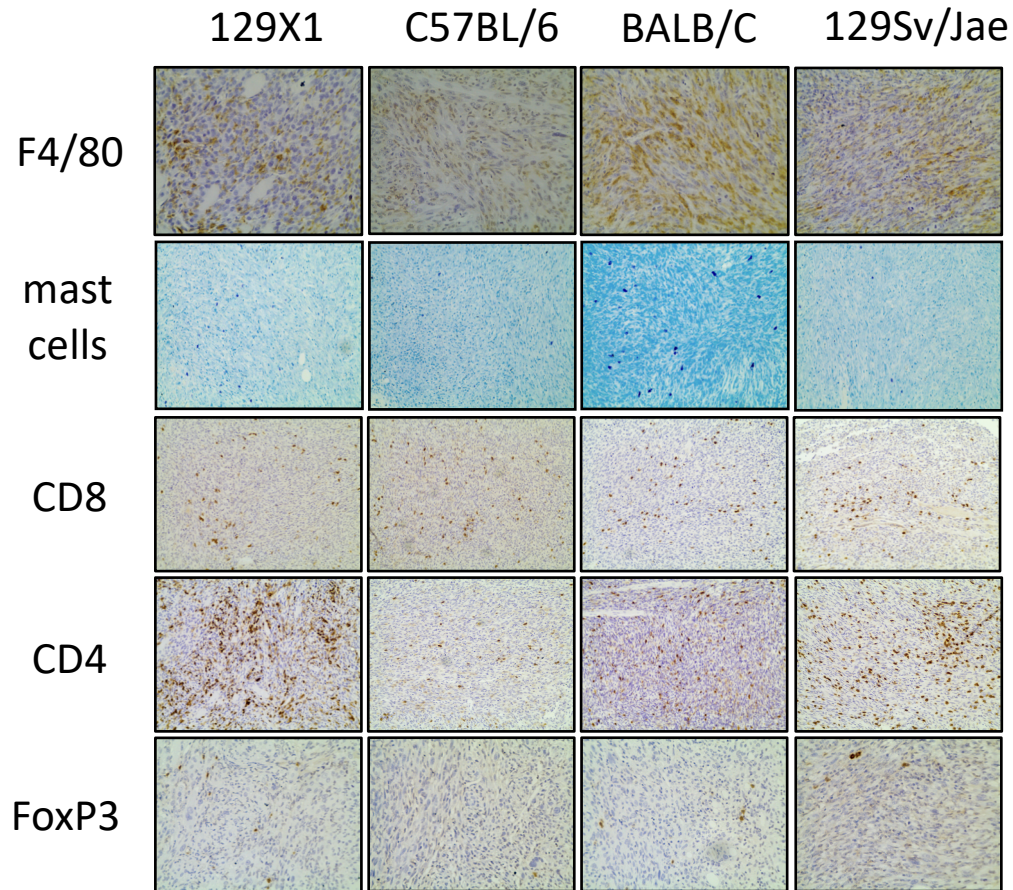

Supplemental Figure 1: IHC of innate and adaptive immune cells in CRISPR/Cas9-generated MPNSTs. Macrophages (F4/80 staining; 40x) and mast cells (toluidine blue staining; 20x) are enriched in MPNSTs from BALB/c mice. Cytotoxic T cells (CD8 staining; 20x) are similar across all strains. Helper T cells (CD4 staining; 20x) are enriched in 129X1 and 129Sv/Jae tumors. Regulatory T cells (FoxP3 staining, 40x) are enriched in 129X1 tumors.

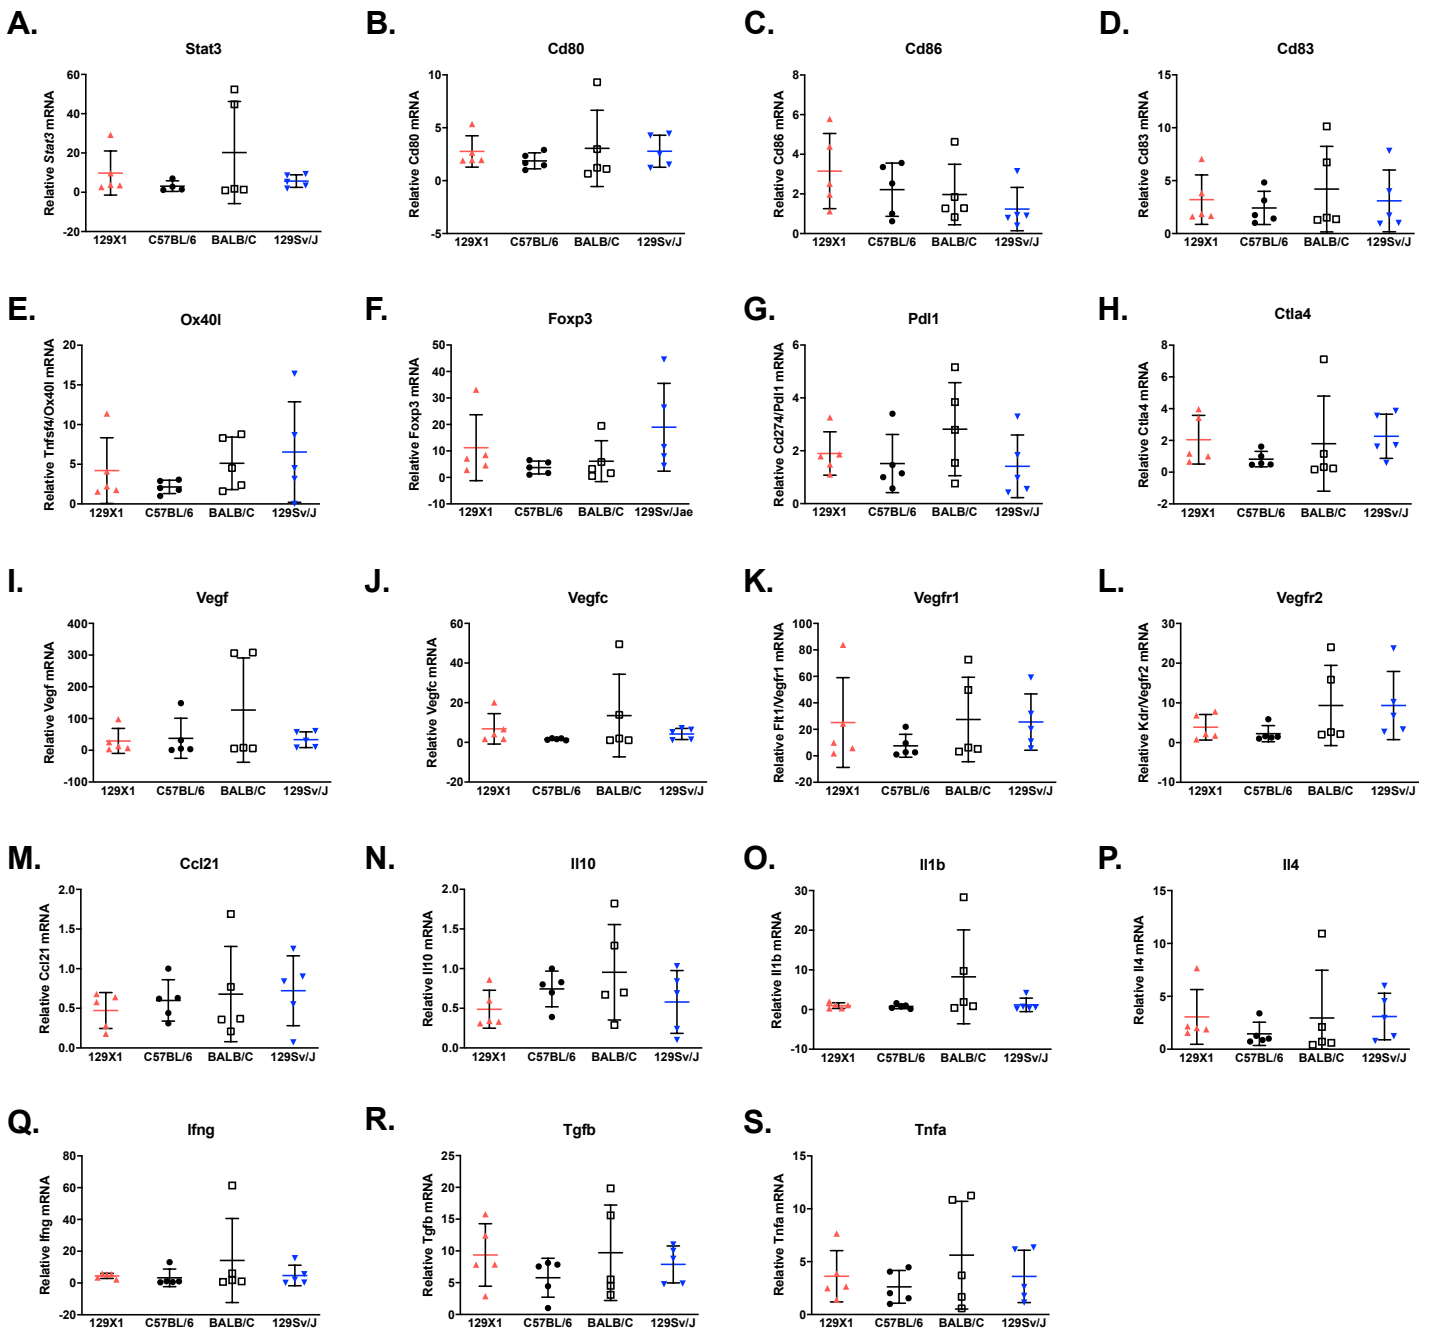

Supplemental Figure 2: Quantitative RT-PCR data from heatmap.  
 Expression levels of genes in the MPNST microenvironment  
 examining macrophages (A), adaptive immunity (B-H), angiogenesis  
 and lymphangiogenesis (I-L), and cytokines (M-S).
